# Supplementary material for: Mussel-Inspired Catechol Functionalisation as a Strategy to Enhance Biomaterial Adhesion: A Systematic Review
Source: MDPI journal article supplement (doi:10.3390/polym13193317), 2021-09-28
Supplement: s1 [file s1]

**Table S1.** - Database search results up to 02 March 2021.

| Search period                                              | Database       | Number of results | Search Strategy                                                                                                                                                                                                                                                        |
|------------------------------------------------------------|----------------|-------------------|------------------------------------------------------------------------------------------------------------------------------------------------------------------------------------------------------------------------------------------------------------------------|
| <b>Initial</b><br>(Database inception to 30 March 2019)    | <b>Pubmed®</b> | 272               | <i>(((dopa*[Title/Abstract] OR catechol[Title/Abstract])) AND (biomaterial OR biopolymer OR scaffold OR matrix OR hydrogel OR device)) AND (modified OR conjugated OR attached OR functionalized OR covalent)) AND (biomimetic OR mussel OR bioinspired OR adhes*)</i> |
|                                                            | <b>Embase®</b> | 218               | <i>(((dopa*[Title/Abstract] OR catechol[Title/Abstract])) AND (biomaterial OR biopolymer OR scaffold OR matrix OR hydrogel OR device)) AND (modified OR conjugated OR attached OR functionalized OR covalent)) AND (biomimetic OR mussel OR bioinspired OR adhes*)</i> |
| <b>Revision/Update</b><br>(01 April 2019 to 02 March 2021) | <b>Pubmed®</b> | 126               | <i>(((dopa*[Title/Abstract] OR catechol[Title/Abstract])) AND (biomaterial OR biopolymer OR scaffold OR matrix OR hydrogel OR device)) AND (modified OR conjugated OR attached OR functionalized OR covalent)) AND (biomimetic OR mussel OR bioinspired OR adhes*)</i> |
|                                                            | <b>Embase®</b> | 82                | <i>(((dopa*[Title/Abstract] OR catechol[Title/Abstract])) AND (biomaterial OR biopolymer OR scaffold OR matrix OR hydrogel OR device)) AND (modified OR conjugated OR attached OR functionalized OR covalent)) AND (biomimetic OR mussel OR bioinspired OR adhes*)</i> |
| <b>Overall</b><br>(Database inception to 02 March 2021)    | <b>Pubmed®</b> | <b>398</b>        | <i>(((dopa*[Title/Abstract] OR catechol[Title/Abstract])) AND (biomaterial OR biopolymer OR scaffold OR matrix OR hydrogel OR device)) AND (modified OR conjugated OR attached OR functionalized OR covalent)) AND (biomimetic OR mussel OR bioinspired OR adhes*)</i> |
|                                                            | <b>Embase®</b> | <b>300</b>        | <i>(((dopa*[Title/Abstract] OR catechol[Title/Abstract])) AND (biomaterial OR biopolymer OR scaffold OR matrix OR hydrogel OR device)) AND (modified OR conjugated OR attached OR functionalized OR covalent)) AND (biomimetic OR mussel OR bioinspired OR adhes*)</i> |
